# Supplementary material for: CHN-CH4: A Gridded (0.1°×0.1°) Anthropogenic Methane Emission Inventory of China from 1990 to 2020
Source: Copernicus journal article supplement (doi:10.5194/essd-2025-178), 2025-04-08
Supplement: Supplementary file 1 [file essd-2025-178-supplement.pdf]

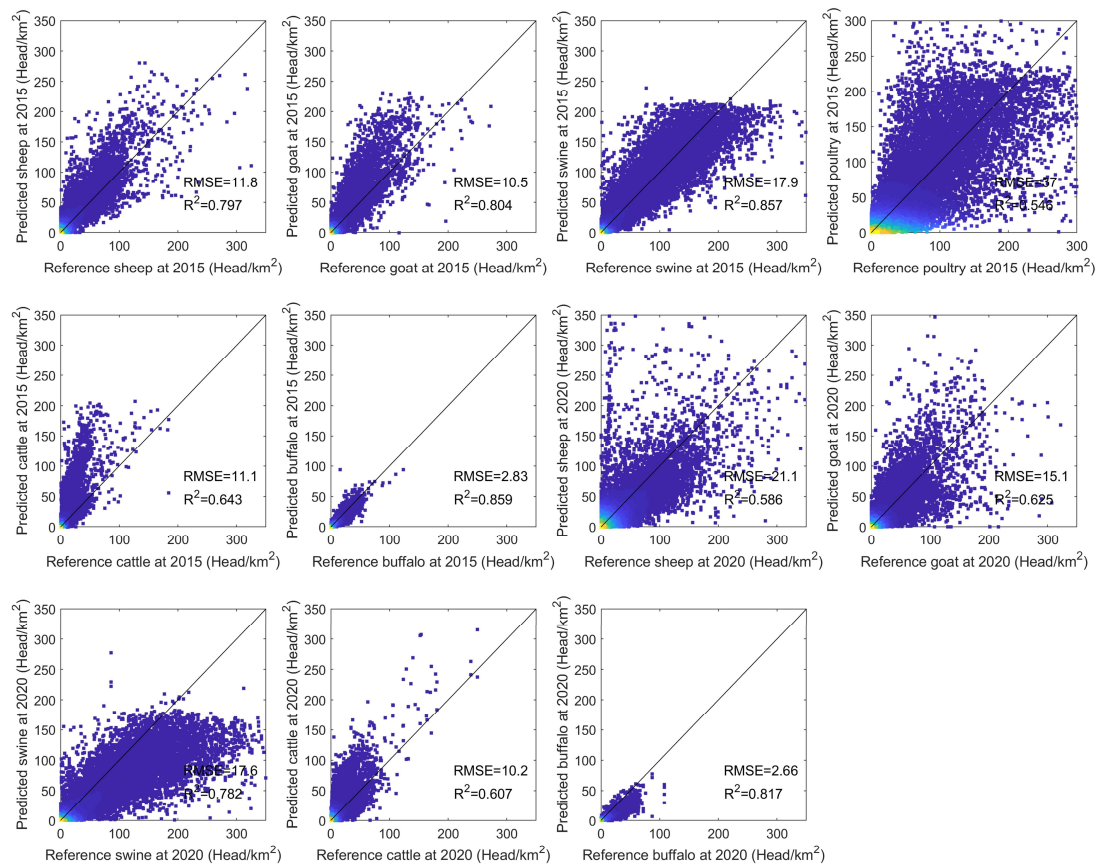

**Figure S1.** Comparison of the predicted livestock density with the reference from FAO (<http://www.fao.org/livestock-systems/en/>) at year 2015 and 2020.

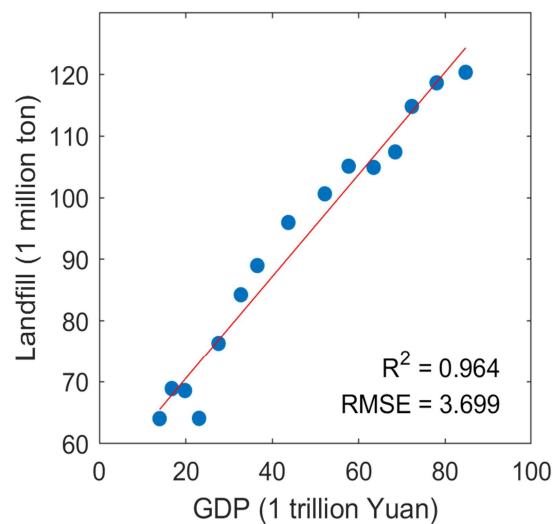

**Figure S2.** Association between landfills and GDP at nation level.

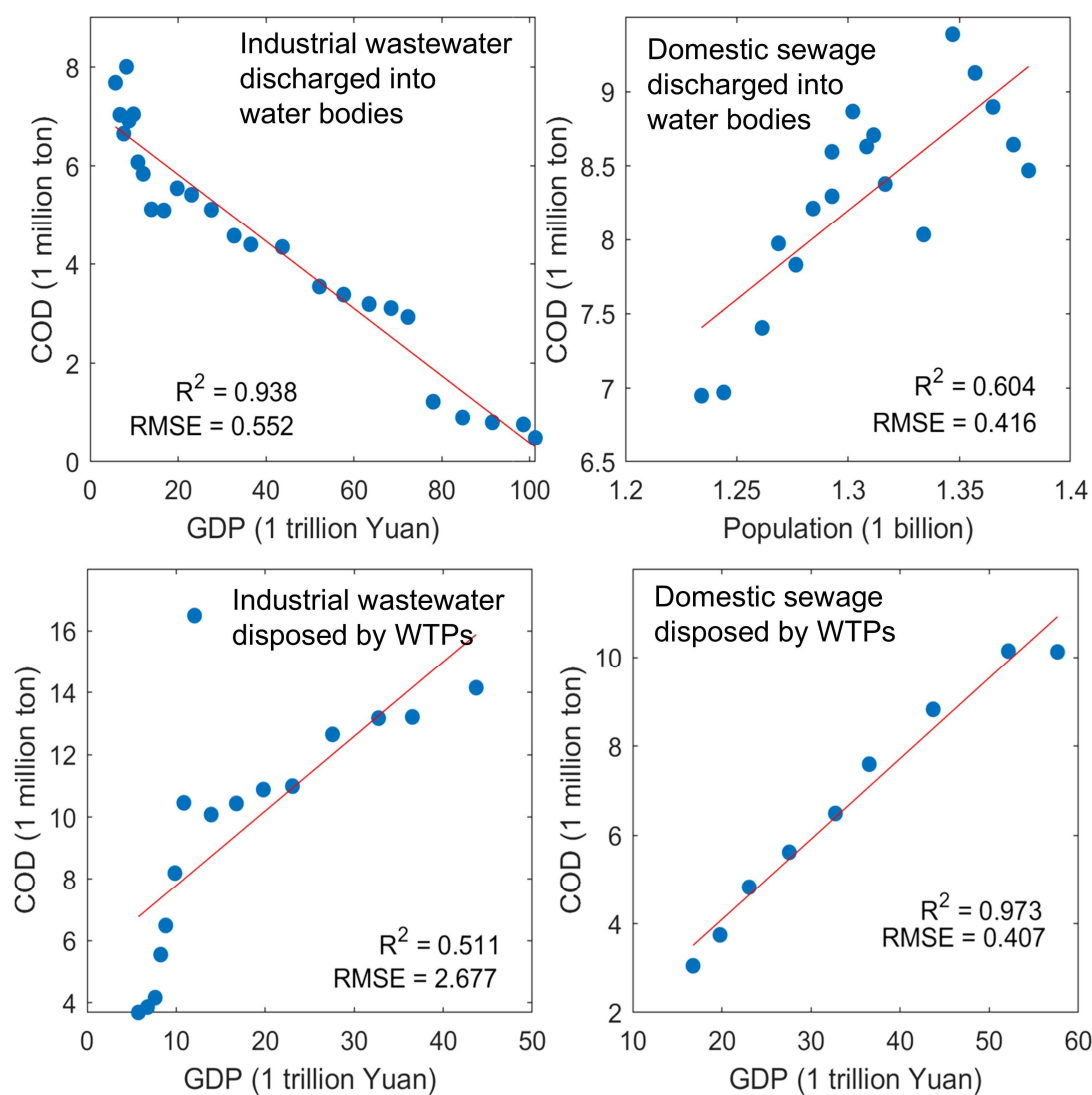

**Figure S3.** Association between GDP and the COD amounts of industrial wastewater directly discharged into waterbodies (a), the COD amounts of industrial wastewater disposed by WTPs (c), the COD amounts of domestic sewage disposed by WTPs (d). And the association between population and the COD amounts of domestic sewage directly discharged into waterbodies (b).
